# Supplementary material
Source: MDPI journal article supplement (https://www.mdpi.com/2312-7481/9/9/206)
Supplement: s1 [file s1]

*Supplementary Information*

# **Magnetic and Impedance Analysis of Fe<sub>2</sub>O<sub>3</sub> Nanoparticles for Chemical Warfare Agent Sensing Applications**

**Jennifer R. Soliz <sup>1</sup>, Smriti Ranjit <sup>2</sup>, Joshua J. Phillips <sup>2</sup>, Richard A. Rosenberg <sup>3</sup>, and Adam J. Hauser <sup>2,\*</sup>**

<sup>1</sup> US Army DEVCOM Chemical Biological Center, 5183 Blackhawk Road, Aberdeen Proving Ground, Edgewood, MD 21010-5424, USA; jennifer.r.soliz.civ@mail.mil

<sup>2</sup> Department of Physics and Astronomy, University of Alabama, Tuscaloosa, AL 35487, USA

<sup>3</sup> Advanced Photon Source, Argonne National Laboratory, Argonne, IL 60439, USA; rosenberg@anl.gov

\* Correspondence: ahauser@ua.edu

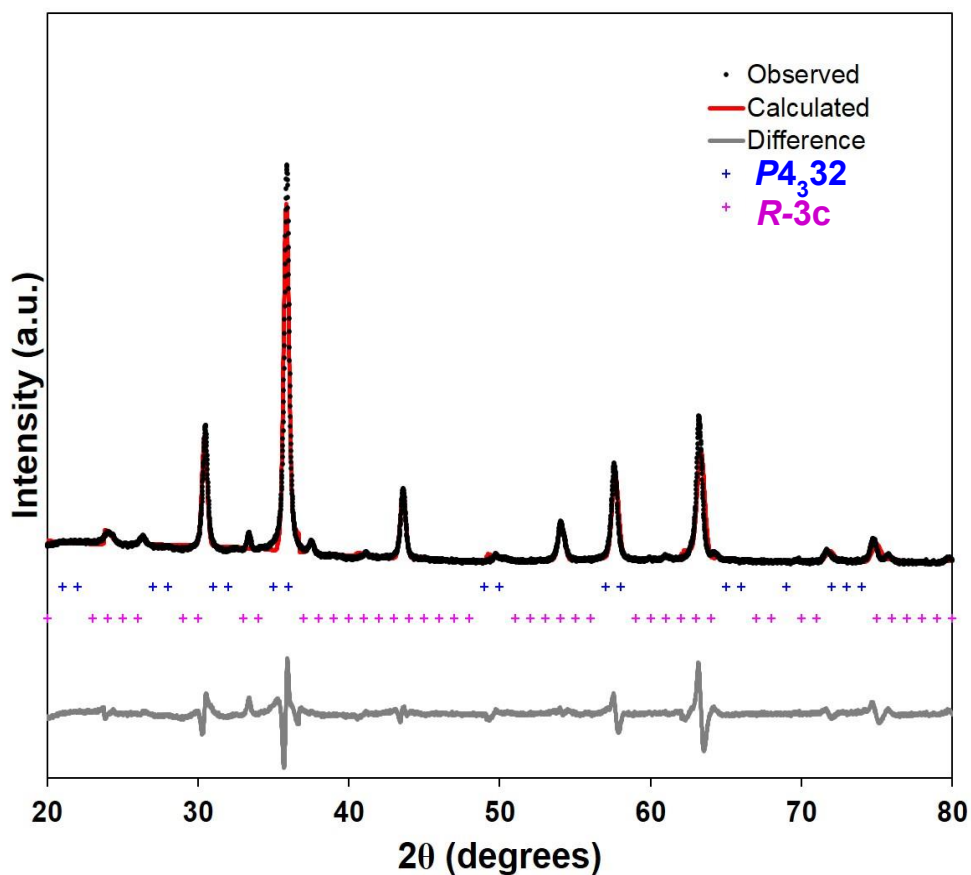

**Figure S1.** X-ray powder diffraction pattern of  $\text{Fe}_2\text{O}_3$  nanoparticles in  $2\theta$  range of 20 to 80 degrees. The black filled circles, red line, gray line, blue crosses, and pink crosses are the observed pattern, calculated pattern, difference curve between the observed and calculated curves, allowed Miller indices for space group  $P4_332$ , and allowed Miller indices for space group  $R-3c$ , respectively.

**Table S1.** Lattice parameters, atomic positions, weight fractions, crystallite size, and  $R_F^2$  factor from X-ray powder diffraction Rietveld refinement.

|                       | $\alpha\text{-Fe}_2\text{O}_3$ | $\gamma\text{-Fe}_2\text{O}_3$ |
|-----------------------|--------------------------------|--------------------------------|
| Space Group           | $R\text{-}\bar{3}c$            | $P4_332$                       |
| Lattice parameters    |                                |                                |
| a (Å)                 | 4.989(3)                       | 8.3058(2)                      |
| c (Å)                 | 13.74(1)                       | -                              |
| Atomic positions      |                                |                                |
| Fe1, x                | 0                              | $\frac{1}{8}$                  |
| y                     | 0                              | 0.3658(8)                      |
| z                     | 0.367(2)                       | 0.8842(8)                      |
| Fe2, x                |                                | $\frac{5}{8}$                  |
| y                     |                                | $\frac{5}{8}$                  |
| z                     |                                | $\frac{5}{8}$                  |
| Fe3, x                |                                | 1.001(1)                       |
| y                     |                                | 1.001(1)                       |
| z                     |                                | 1.001(1)                       |
| O1, x                 | 0.18(1)                        | 0.865(4)                       |
| y                     | 0                              | 0.865(4)                       |
| z                     | $\frac{1}{4}$                  | 0.865(4)                       |
| O2, x                 |                                | 0.119(4)                       |
| y                     |                                | 0.122(4)                       |
| z                     |                                | 0.380(4)                       |
| Wt. Fractions         | 0.091(4)                       | 0.9090(6)                      |
| Crystallite size (nm) |                                | 23                             |
| $R_F^2$               |                                | 0.1461                         |
